# Supplementary material
Source: Springer Nature journal article supplement (https://www.springermedizin.de/resource/supplementary/12885_2013_4492_MOESM2_ESM.pdf/9466502)

**a**

CCR7/GAPDH

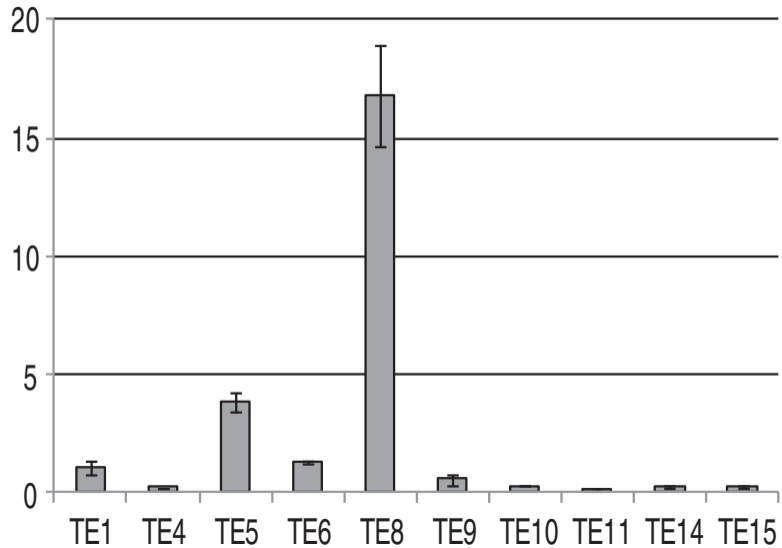**b**

CCR7/GAPDH

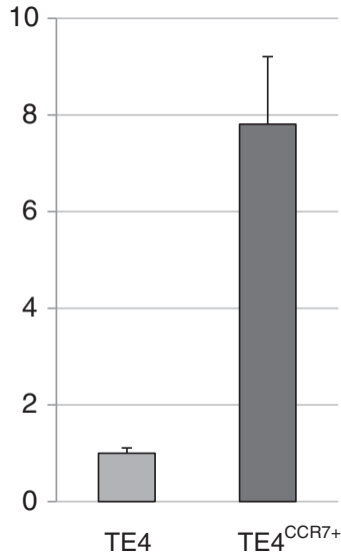

Supplement: MOESM2 [file 9466502]
